# Supplementary material for: A mitochondrial rRNA dimethyladenosine methyltransferase in Arabidopsis
Source: PubMed Central journal article supplement (PMC2860759; doi:10.1111/j.1365-313x.2009.04079.x), 2010-02
Supplement: tpj0061-0558-SD1.pdf [file tpj0061-0558-SD1.pdf]

A

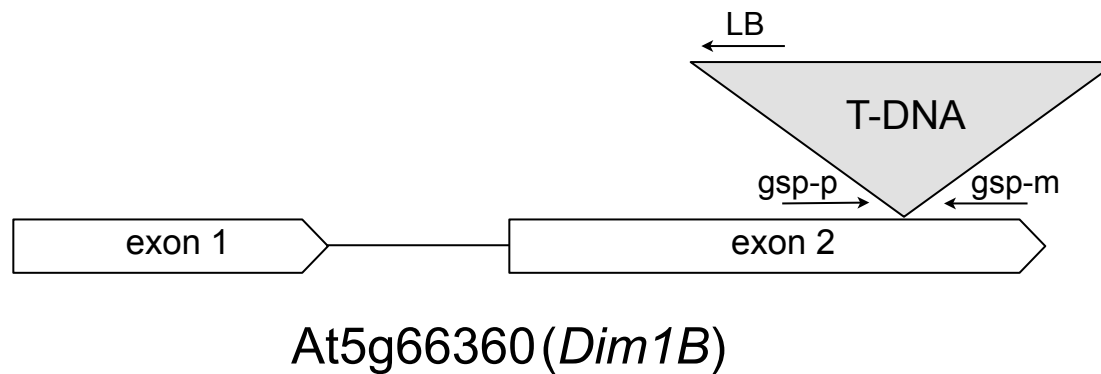

B

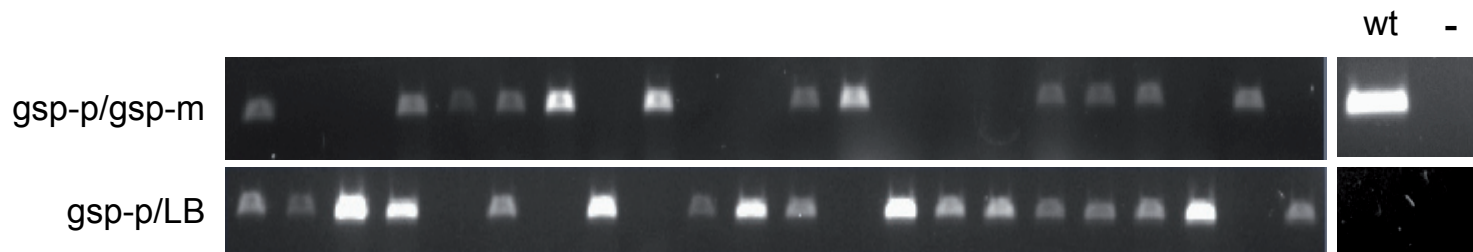

|                     |    |
|---------------------|----|
| wildtype            | 5  |
| heterozygote mutant | 9  |
| homozygote mutant   | 10 |
