# Supplementary material for: A mitochondrial rRNA dimethyladenosine methyltransferase in Arabidopsis
Source: PubMed Central journal article supplement (PMC2860759; doi:10.1111/j.1365-313x.2009.04079.x), 2010-02

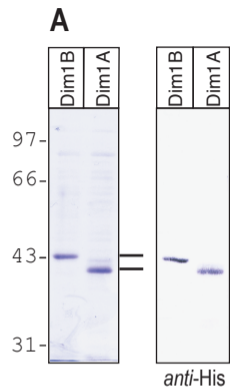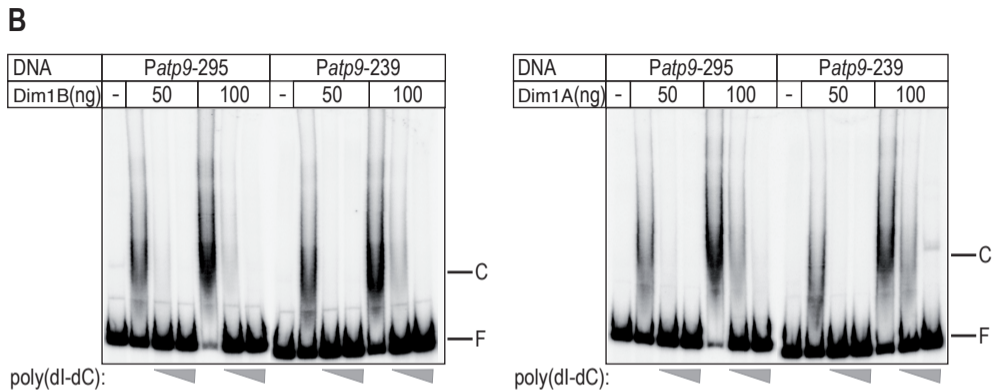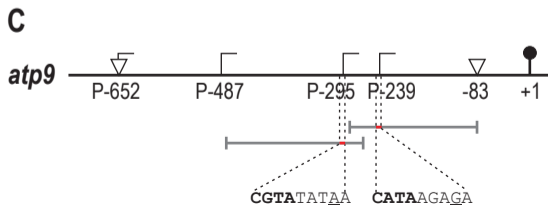

Supplement: tpj0061-0558-SD4.pdf [file tpj0061-0558-SD4.pdf]
